# Supplementary material
Source: PubMed Central journal article supplement (PMC10086509)
Supplement: thoraxjnl-2021-217526supp001.pdf [file thoraxjnl-2021-217526supp001.pdf]

## Supplementary data

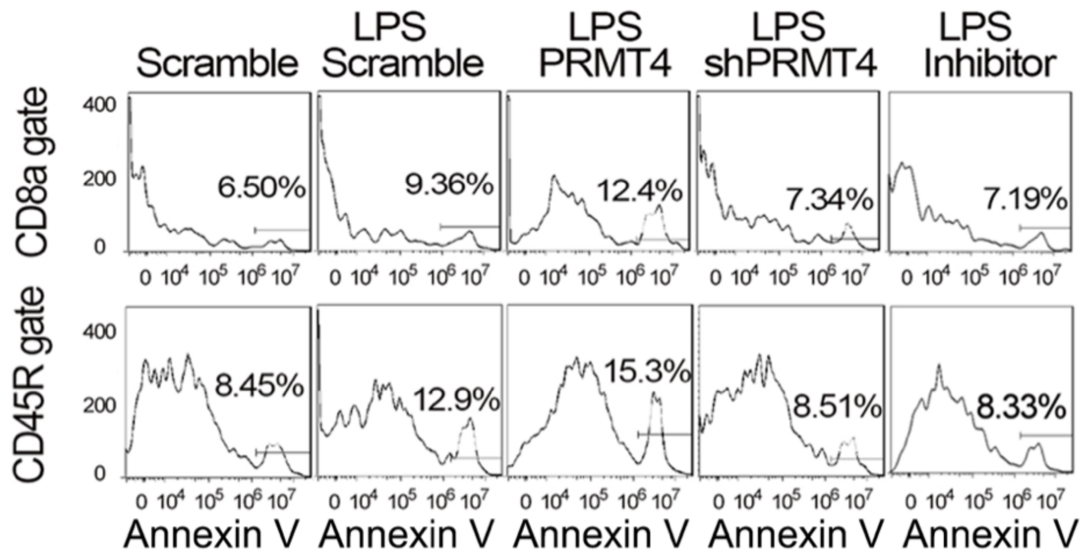

**sFig. 1. PRMT4 mediates cell death of CD8<sup>+</sup> T cells and CD45R<sup>+</sup> B cells in LPS lung injury mouse models.** PRMT4 lenti-viral expression and knockdown particles were intratracheally administered in C57BL/6J mice for 14 d. LPS was subsequently challenged for 24 h. Total T cells or B cells were isolated from mouse splenic tissues using negative selection kits and analyzed with flow cytometry. CD8a was used as a CD8 T lymphocyte marker. CD45R was used as the marker of B lymphocytes.

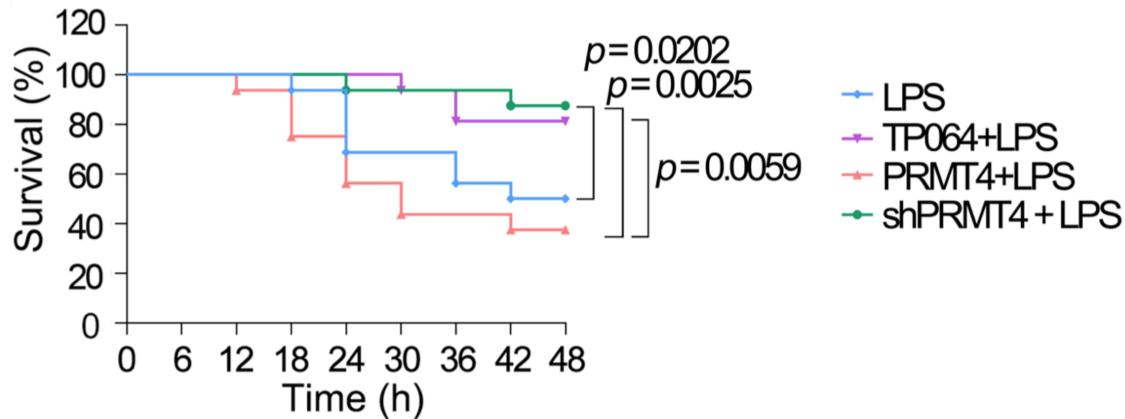

**sFIG. 2. Replication of LPS-induced lung injury murine model.** PRMT4 lenti-viral expression, knockdown, or empty vector particles were intratracheally administered in C57BL/6J mice for 14 d. LPS was performed mice, and one group of mice were treated with TP064. Mouse survival were observed for 48 h. ( $n = 16$  in each group).

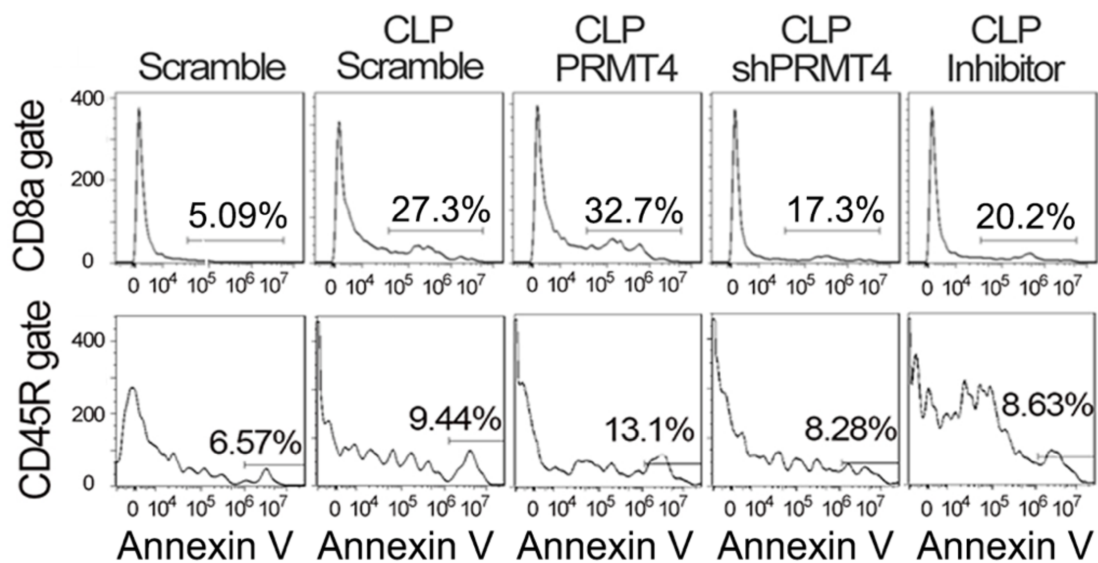

**sFig. 3. PRMT4 mediates cell death of CD8+ T cells and CD45R+ B cells in the CLP septic mouse model.** PRMT4 lenti-viral expression and knockdown particles were intratracheally

administered in C57BL/6J mice for 14 d. CLP procedure was performed mice, and mice were harvested at the prespecified time of 48 h. Total T cells or B cells were isolated from mouse splenic tissues using negative selection kits. Cells were stained with CD8 or CD45R antibodies and analyzed with flow cytometry. CD8a was used as CD8+ T lymphocyte marker. CD45R was used as the marker of B lymphocytes.

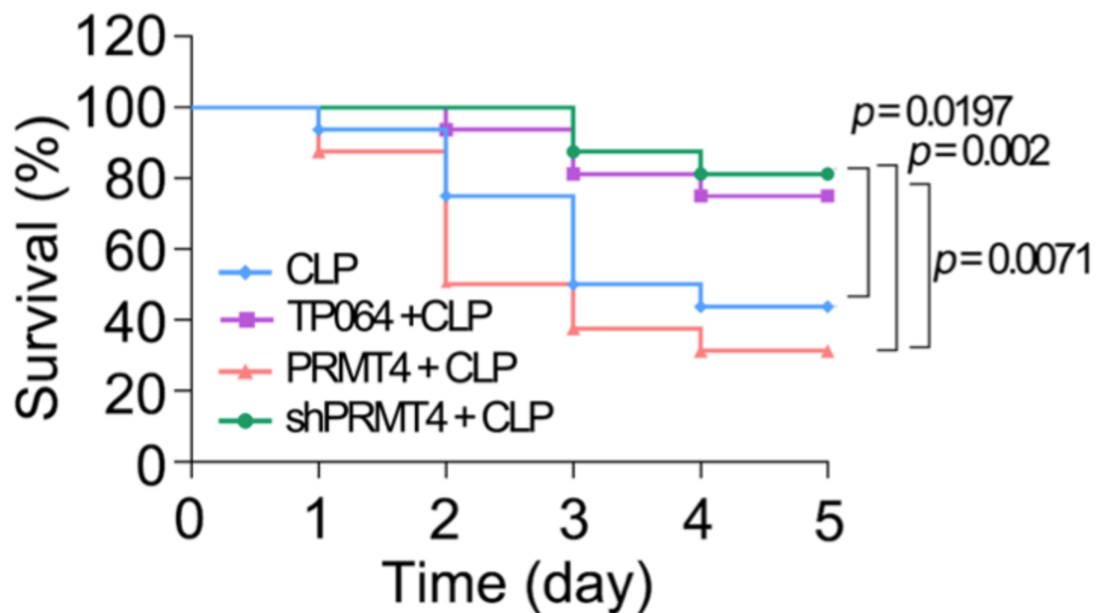

**sFIG. 4. Replication of CLP septic murine model.** PRMT4 lenti-viral expression and knockdown particles were intratracheally administered in C57BL/6J mice for 14 d. CLP procedure was performed mice, and one group of mice were treated with TP064. Mouse survival were observed for 5 days. (n = 16 in each group).

**Supplementary Table 1 – One stage meta-analysis of the murine LPS mediated acute lung injury model.**

| group         | Haz. Ratio. | Std. err. | Z.    | P>  z  | [95% conf. | interval] |
|---------------|-------------|-----------|-------|--------|------------|-----------|
| PRMT4 + LPS.  | 1.632915    | .6251621  | 1.28  | 0.200. | .7710468.  | 3.        |
| shPRMT4 + LPS | .1428879    | .1091758  | -2.55 | 0.011  | .0319611   | .63       |
| TP064 + LPS.  | .2837468    | .1639594  | -2.18 | 0.029  | .0914272   | .88       |

\*This is HR (95% CI and p value ) of pooled data (n=104)

**Supplementary Table 2 – One stage meta-analysis of the murine CLP septic model.**

| group         | Haz. Ratio. | Std. err. | Z.    | P>  z | [95% conf. | interval] |
|---------------|-------------|-----------|-------|-------|------------|-----------|
| PRMT4 + CLP.  | 1.387858    | .5019132  | 0.91  | 0.365 | .6831428   | 2.819542  |
| shPRMT4 + CLP | .2243417    | .1273488  | -2.63 | 0.008 | .073743    | .6824948  |
| TP064 + CLP.  | .3462799    | .1691909  | -2.17 | 0.030 | .1329027   | .9022375  |

\*This is HR (95% CI and p value ) of pooled data (n=104)
